# Supplementary material for: Overexpression of the Rubus idaeus Polygalacturonases Gene RiPG2 Accelerates Fruit Softening in Solanum lycopersicum
Source: MDPI journal article supplement (doi:10.3390/agronomy14010160), 2024-01-10
Supplement: s1 [file s1]

**Table S1.** List of primers used in this study.

| Primer Name          | Primer Sequence (5'→3')                            | Purpose                          |
|----------------------|----------------------------------------------------|----------------------------------|
| <i>RiPG2</i> -F      | ATGAACATCCTTGAGAATCCCAG                            | full-length cDNA of <i>RiPG2</i> |
| <i>RiPG2</i> -R      | TCAAGCACATCGAGGGGAG                                | full-length cDNA of <i>RiPG2</i> |
| site-F               | CTATGCTGGCTTGGCTTTTATCTGGATCCATGAACATCCTTGAGAATCCC | PCR for homologous recombination |
| site-R               | CAGCTCCTCGCCCTTGCTCACCATGTCTGACAGCACATCGAGGGGAGGA  | PCR for homologous recombination |
| <i>RiPG2-qPCR</i> -F | CCCAGCAAATGCACGTCAG                                | qPCR                             |
| <i>RiPG2-qPCR</i> -R | CGTCACCTGTTCCGATAATGC                              | qPCR                             |
| <i>RiI8s</i> -F      | CTACCTATTGTAAGGAATGGTGCCT                          | qPCR                             |
| <i>RiI8s</i> -R      | TTCTGCATCCGAGATATCAAGTAGT                          | qPCR                             |
| <i>SIEXP</i> -F      | TCGCCCTCACTTTGACCTCGCTA                            | qPCR                             |
| <i>SIEXP</i> -R      | TCTGATTCCCTCCTTGCTTTTCGGC                          | qPCR                             |
| <i>SITBG4</i> -F     | GATTGTCTTGGCAGTCATAC                               | qPCR                             |
| <i>SITBG4</i> -R     | TACCAGCTCTTAACTTCACG                               | qPCR                             |
| <i>SIP1</i> -F       | GACCCCGTGAACCCTAAA                                 | qPCR                             |
| <i>SIP1</i> -R       | TGTTGCTGGTATGGTGGAT                                | qPCR                             |
| <i>SIXTH5</i> -F     | AAGATATACTCTATGGTTTGATCC                           | qPCR                             |
| <i>SIXTH5</i> -R     | ATTGGCTTTGATGGGTAGTCTCC                            | qPCR                             |
| <i>SlActin</i> -F    | TGTCCCTATCTACGAGGGTTATGC                           | qPCR                             |
| <i>SlActin</i> -R    | AGTTAAATCACGACCAGCAAGAT                            | qPCR                             |

ATGAACATCCTTGAGAATCCCAGGTTCTCCAAATCGATCAATCTGCGAACTCAGCTCTTCAGCAAATCATCTTCA  
 M N I L E N P R F S K S I N L R T Q L F S K S S S  
 GTTAAATGGTTAGCGTCGATGATTTTGGCGCTAAGGGAAATGGAGCTGCCGATGACACACAGGCATTTCAAAAG  
 V K M V S V D D F G A K G N G A A D D T Q A F Q K  
 GCGTGGAAGGCAGCTTGTAGTTCCAATGGGGCACATGTTCTTCTCGTGCCAAAGAAGAACTATCTTGTTAAGCCA  
 A W K A A C S S N G A H V L L V P K K N Y L V K P  
 ATCACATTTTCAGGGCCATGCAAATCTAAGCTTACAATGCAGATATATGGAAGCATAGAAGCATCTGATGACAGA  
 I T F S G P C K S K L T M Q I Y G S I E A S D D R  
 TCAGTCTACAGCAAAGACCTTTATCACTGGATCATCTTTGACAACGTTGAAATCTGTTAGTTCAAGGTCCTGGA  
 S V Y S K D L Y H W I I F D N V R N L L V Q G P G  
 ACCATCAATGGCAACGGTCAAATCTGGTGGCAAAACTCTTGCAAAAAATAAACATACTAAGCCTTGTGGTACGCTA  
 T I N G N G Q I W W Q N S C K N K H T K P C G T L  
 GCACCTACGGCTGTGACGTTCTACCAATGCAATAACTTGGTGGTGAAGAATCTTAAGTTCAAAGACTCCCAGCAA  
 A P T A V T F Y Q C N N L V V K N L K F K D S Q Q  
 ATGCACGTCAGCTTCGAAGATTGCACGAACGTTCAAGCTTTATATCTTACAGTAACTGCGCCGGAGACTAGTCCC  
 M H V S F E D C T N V Q A L Y L T V T A P E T S P  
 AACACCGATGGCATTGTTTCAAATACCCAGAACATCACAATCTCACACAGCATTATCGGAACAGGTGGCGAC  
 N T D G I H V S N T Q N I T I S H S I I G T G G D  
 TGTATTTCTATCGTAAGTGGATCCCAAAATGTGCAAGCCTCCAGTATTACCTGTGGACCAGGCCATGGAATCAGT  
 C I S I V S G S Q N V Q A S S I T C G P G H G I S  
 ATCGGTAGCTTGGGGGAAGGAGGGTCTGAAGACCGTGTTCAAAAGTAACGGTGAACGGAGCTAAGATTTTCGGGA  
 I G S L G E G G S E D R V S K V T V N G A K I S G  
 ACCATGAACGGAGTCAGGATCAAGACATGGCAAGGAGGCTCAGGAATGGCAAGCAACATTGTGTTTCAGAACATT  
 T M N G V R I K T W Q G G S G M A S N I V F Q N I  
 GAAATGAATGATGTGACTAACCCATAATCATAGACCAAACTATTGTGACACTAGTGACAAACGGAAATGCAAA  
 E M N D V T N P I I I D Q N Y C D T S D K R K C K  
 CAACAGAGTAAGGCAGTGAAAGTGCAGAATGTGTTGTACAAAAACATCAGAGGAACGAGCGCTTCGAAATATGCC  
 Q Q S K A V K V Q N V L Y K N I R G T S A S K Y A  
 ATAGCATTTGATTGCAGCAAGAGCATTCCATGTGAGGGAATTGTGCTGCAAAATGTTCAACTCAACAAAAGAGCA  
 I A F D C S K S I P C Q G I V L Q N V Q L N K R A  
 AAATGCAGCAATGCTAATCTGGCTTACAAAGGAAATGTCTCTCCCTCGATGTGCTTGA  
 K C S N A N L A Y K G N V S S P R C A \*

**Figure S1.** Nucleotide and deduced amino acid sequences of *RiPG2* gene.

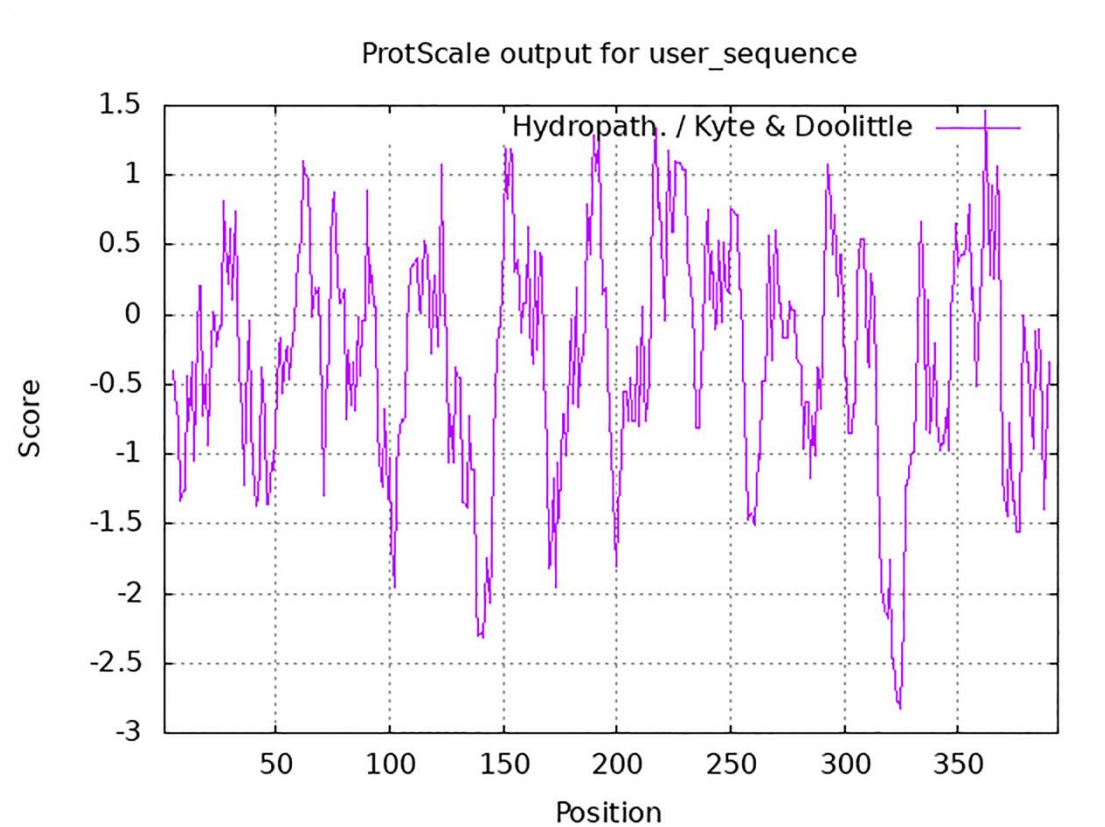

**Figure S2.** Hydrophilicity prediction of RiPG2 protein.
